# Supplementary material for: Selective PPARδ agonist seladelpar suppresses bile acid synthesis by reducing hepatocyte CYP7A1 via the fibroblast growth factor 21 signaling pathway
Source: PubMed Central journal article supplement (PMC9214809; doi:10.1016/j.jbc.2022.102056), 2022-05-20

Figure S1

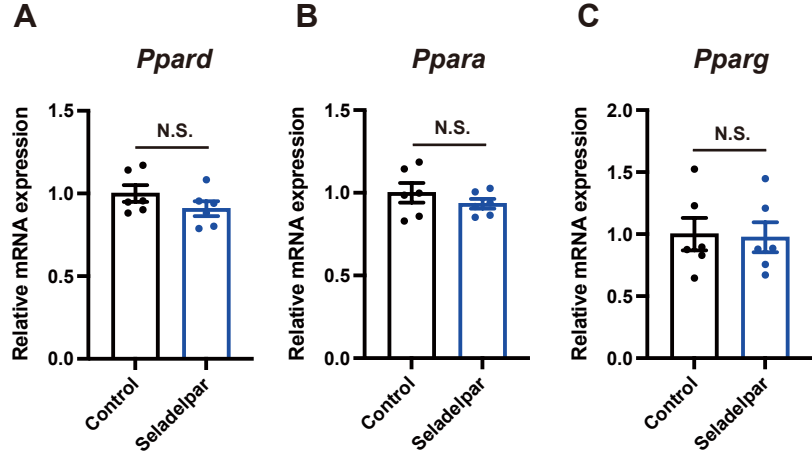

Figure S2

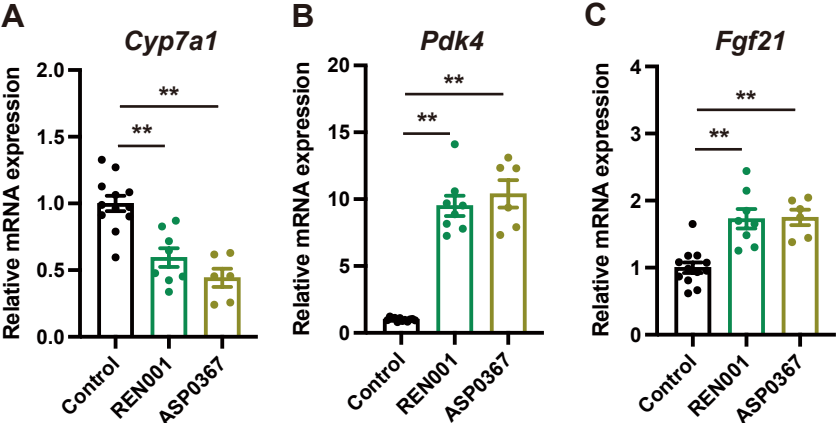

Figure S3

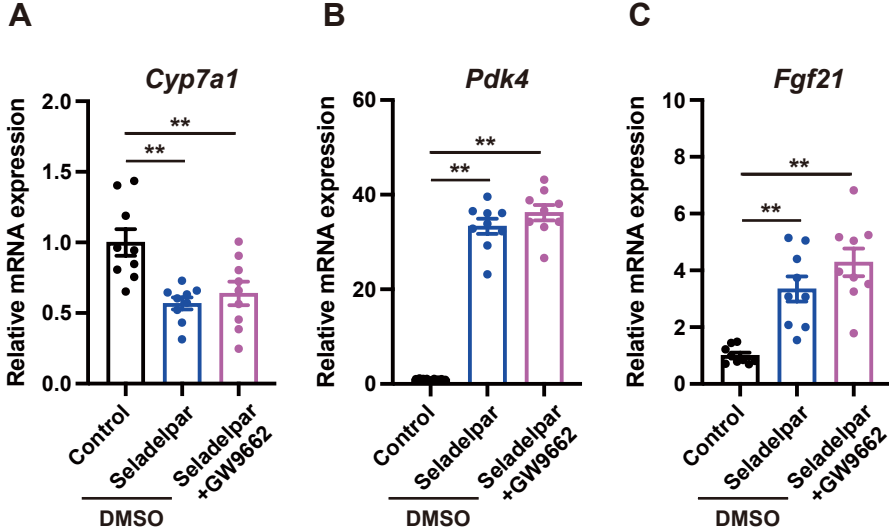

Figure S4

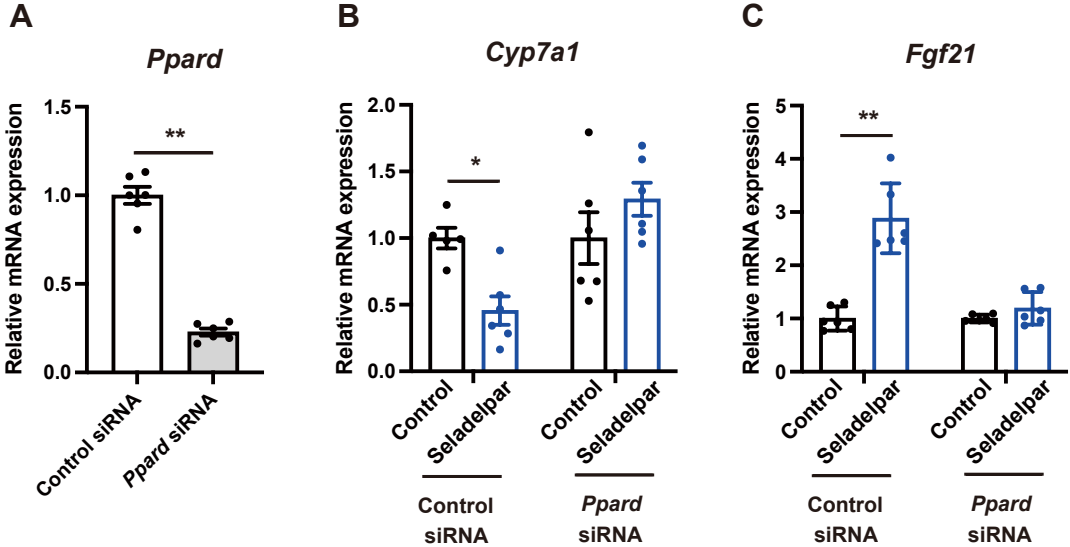

Figure S5

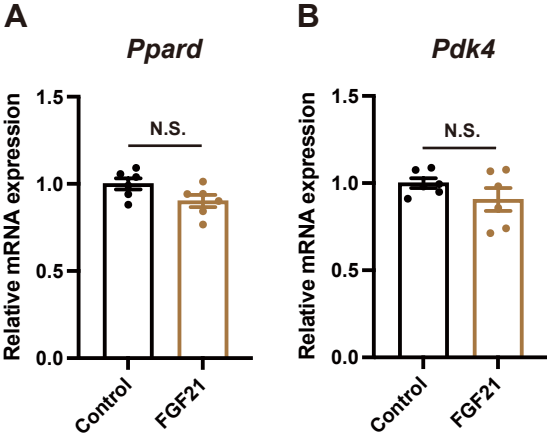

Supplement: mmc2.pdf [file mmc2.pdf]
